# Supplementary material for: Enhancing proton mobility and thermal stability in phosphate glasses with WO3: the mixed glass former effect in proton conducting glasses
Source: Royal Society of Chemistry journal article supplement (doi:10.1039/d3cp01453c), 2023-01-01
Supplement: d3cp01453c1.pdf [file d3cp01453c1.pdf]

## Supplementary information

# Enhancing proton mobility and thermal stability in phosphate glasses with WO<sub>3</sub>: The mixed glass former effect in proton conducting glasses

Aman Sharma,<sup>a</sup> Issei Suzuki,<sup>a</sup> Tomohiro Ishiyama,<sup>b</sup> and Takahisa Omata<sup>\*a</sup>

<sup>a</sup> Institute of Multidisciplinary Research for Advanced Materials (IMRAM),  
Tohoku University, 2-1-1 Katahira, Aoba-ku, Sendai 980-8577, Japan.

<sup>b</sup> Research Institute for Energy Conservation, Department of Energy and Environment,  
National Institute of Advanced Industrial Science and Technology (AIST), 1-1-1 Higashi, Tsukuba,  
Ibaraki 305-8565, Japan

### S1. Proton injection by APS

Figure S1 depicts the depth profiles of  $C_{Na}$  and  $C_{OH}$  for all glasses after alkali-proton substitution (APS). The profiles indicate that over 90% of Na ions were discharged from the glasses, and a large amount of OH was introduced into the glasses through APS. The electrochemical substitution of Na<sup>+</sup> ions with protons was successfully conducted, as evidenced by the comparable absolute values of the changes in  $C_{Na}$  and  $C_{OH}$ ,  $\Delta C_{Na}$ , and  $\Delta C_{OH}$ , before and after APS.

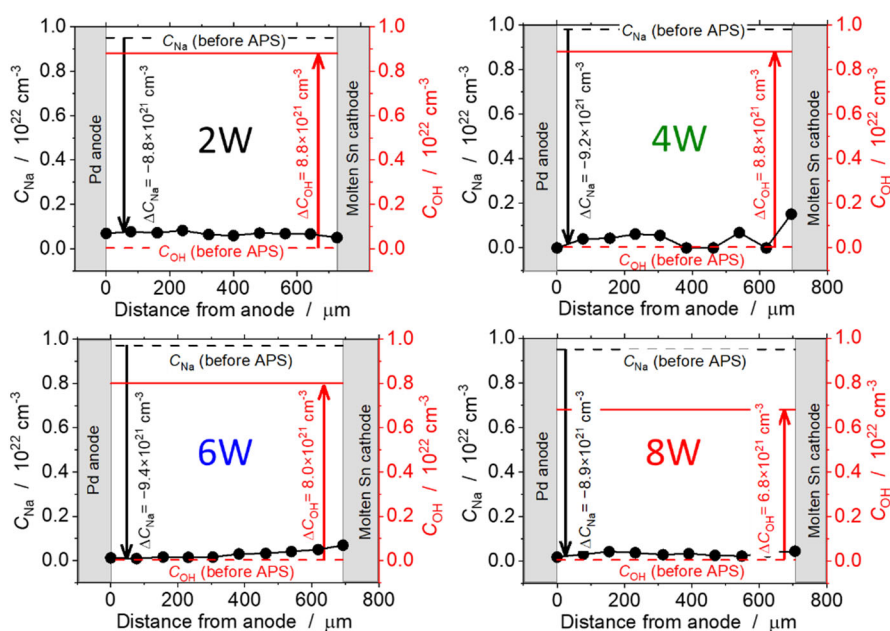

**Fig S1** Depth profiles of  $C_{Na}$  (black dots) and  $C_{OH}$  (red solid line) for  $xW$ -glass after alkali-proton substitution (APS). The black and red dashed lines indicate  $C_{Na}$  and  $C_{OH}$ , respectively, for the  $xW$ -glass before APS.

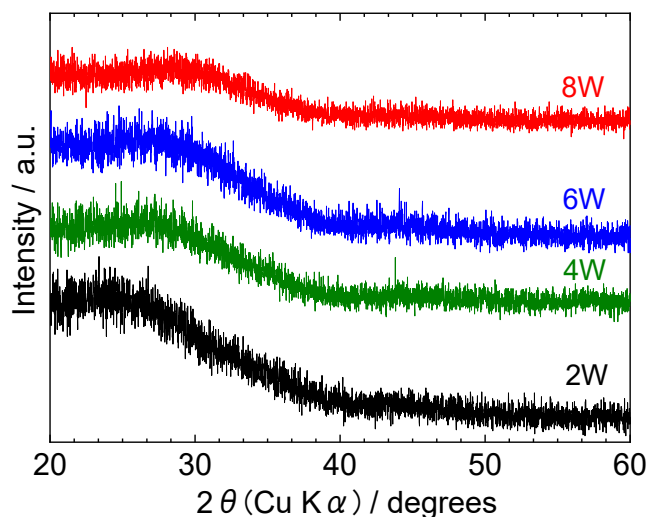

Figure S2. XRD patterns of the  $x$ W glasses after APS.

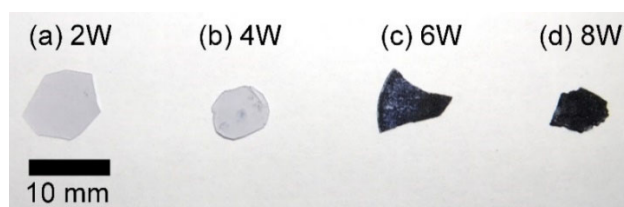

Fig S3 Photographic images of the glasses after alkali-proton substitution (APS) for the (a) 2W-, (b) 4W-, (c) 6W-, and (d) 8W-glasses.

## S2. Proton conductivity

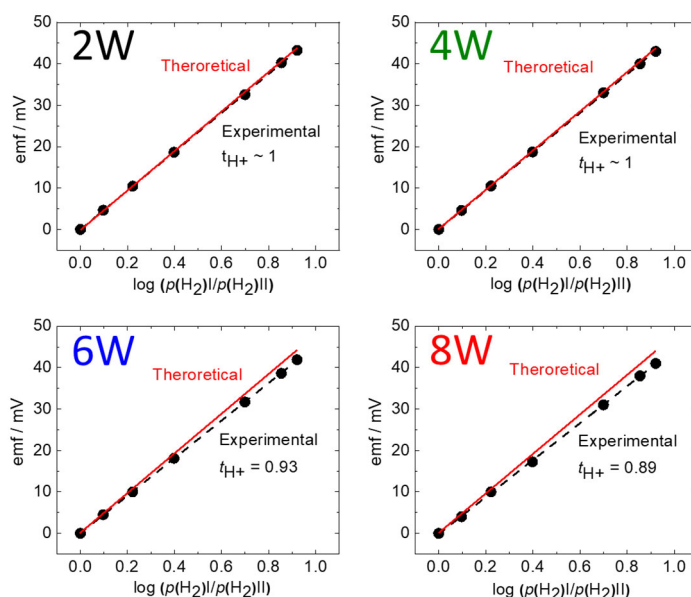

Fig S4 Electromotive forces (EMFs) for the hydrogen concentration cell as a function of logarithmic hydrogen partial pressure,  $p(\text{H}_2)$ , ratio at 207 °C for  $x$ W glass after alkali-proton substitution (APS). The theoretical emfs calculated using the Nernst equation,  $E = (RT/2F) \ln(p(\text{H}_2)_{\text{high}}/p(\text{H}_2)_{\text{low}})$  are shown as red lines.

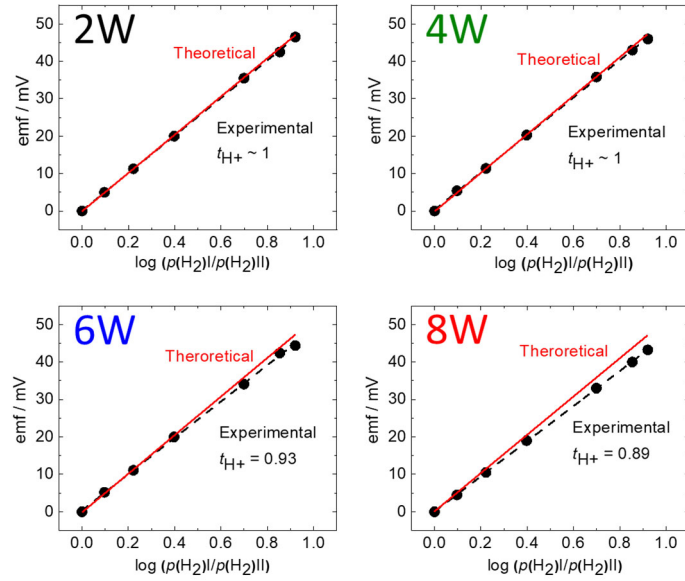

**Fig S5** Electromotive forces (EMFs) for the hydrogen concentration cell as a function of logarithmic hydrogen partial pressure,  $p(\text{H}_2)$ , ratio at 243 °C for  $x\text{W}$  glass after alkali-proton substitution (APS). The theoretical emfs calculated using the Nernst equation,  $E = (RT/2F) \ln(p(\text{H}_2)_{\text{high}}/p(\text{H}_2)_{\text{low}})$  are shown as red lines.

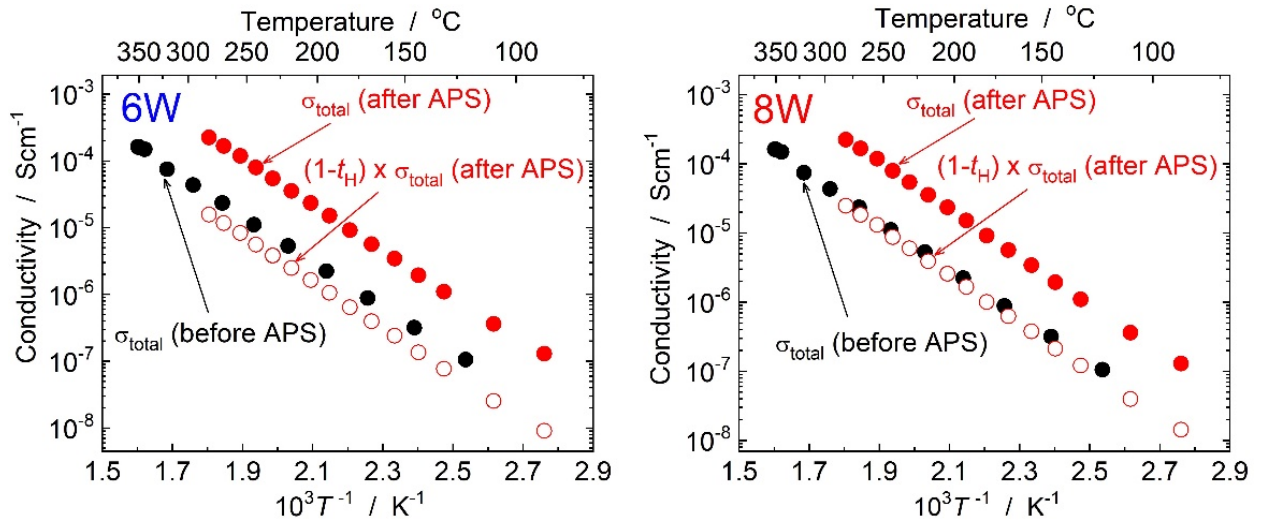

**Fig S6** Arrhenius plot of the total conductivity ( $\sigma_{\text{total}}$ ) and partial conductivity due to non-proton contributions ( $(1-t_{\text{H}}) \times \sigma_{\text{total}}$ ) of the 6W- and 8W- glasses after APS comparing with the total conductivity, i.e., approximately  $\text{Na}^+$  ion conductivity, of the corresponding glasses before APS.

### S3. Raman spectra

**Table S1** Assignment of the Raman bands observed for  $x$ W-glass after alkali-proton substitution (APS).

| Assignment <sup>a</sup>           | Position / cm <sup>-1</sup> |             |             |             | Ref.                                                                   |       |
|-----------------------------------|-----------------------------|-------------|-------------|-------------|------------------------------------------------------------------------|-------|
|                                   | 2W                          | 4W          | 6W          | 8W          |                                                                        |       |
| $\delta_{O-M-O}$                  | 265                         | 265         | 265         | 265         | Bending mode of O–M–O of $MO_6$ octahedra                              | S1-S4 |
| $\delta_{O-M-O^-}$                | 380                         | 380         | 380         | 380         | Bending mode of O–M–O <sup>-</sup> of $MO_6$ octahedra                 | S1-S4 |
| $\delta_{O-M-O} + \delta_{O-P-O}$ | 508                         | 509         | 512         | 514         | Combination mode of the O–M–O bending mode with the O–P–O bending mode | S1-S4 |
| $\nu_{M-O}$                       | 598                         | 596         | 595         | 594         | Stretching mode of the M–O bond of $MO_6$ octahedra                    | S1-S4 |
| $\nu_{P-O-P, \text{sym}}(Q^2)$    | 714                         | 724         | 738         | 746         | Symmetric stretching mode of the P–O–P bond for the $Q^2$ unit         | S5-S6 |
| $\nu_{M-O^-}$                     | 917,<br>950                 | 912,<br>954 | 907,<br>956 | 902,<br>956 | Stretching mode of the M–O <sup>-</sup> bond of $MO_6$ octahedra       | S1-S4 |
| $\nu_{O-P-O, \text{sym}}(Q^2)$    | 1163                        | 1159        | 1157        | 1153        | Symmetric stretching mode of NBOs for the $Q^2$ unit                   | S5-S6 |
| $\nu_{O-P-O, \text{assym}}(Q^2)$  | 1246                        | 1244        | 1242        | 1240        | Asymmetric stretching mode of NBOs for the $Q^2$ unit                  | S5-S6 |

<sup>a</sup>  $M$  denotes Nb or W

### References

- S1M. G. Donato, M. Gagliardi, L. Sirleto, G. Messina, A. A. Lipovskii, D. K. Tagantsev and G. C. Righini, *Appl. Phys. Lett.*, 2010, **97**, 231111.
- S2A. El Jazouli, J. C. Viala, C. Parent, G. Le Flem and P. Hagenmuller, *J. Solid State Chem.*, 1988, **73**, 433–439.
- S3K. Fukumi and S. Sakka, *J. Mater. Sci.*, 1988, **23**, 2819–2823.
- S4J. M. Jheng and I. E. Wachs, *Chem. Mater.*, 1991, **3**, 100–107.
- S5R. K. Brow, *J. Non Cryst. Solids*, 2000, **263–264**, 1–28.
- S6R. K. Brow, D. R. Tallant, J. J. Hudgens, S. W. Martin and A. D. Irwin, *J. Non Cryst. Solids*, 1994, **177**, 221–228.
